# Supplementary material
Source: PubMed Central journal article supplement (PMC3256667)
Supplement: supp_194.2.218_FigS1-S2.pdf [file supp_194.2.218_FigS1-S2.pdf]

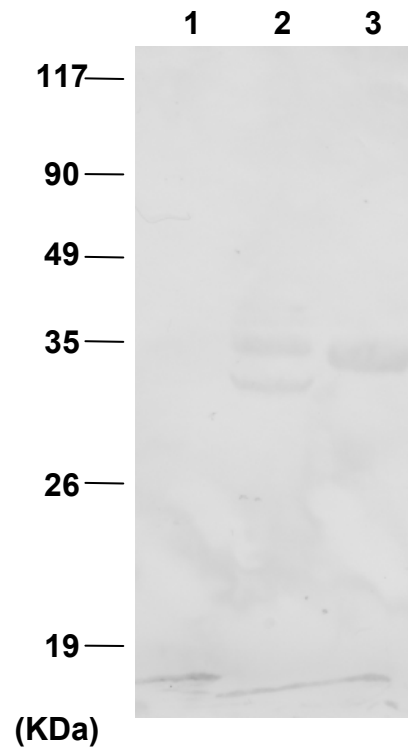

**Fig. S2 Western blot analysis of the expression of NADKs in *E. coli*.** Total soluble proteins of *E. coli* BL21(DE3) carrying pET21b (lane 1), pHB3049 (lane 2) and pHB2966 (lane 3) with monoclonal antibody against 6His.tag (Cell signaling technology, USA) and visualized with NBT/BCIP(Invitrogen, USA). Plasmids pHB3049 and pHB2966 were used for expression of recombinant Sir0400 and Sir1415 respectively.
